# Supplementary material for: A systematic review and evidence assessment of monogenic gene-disease relationships in human male infertility
Source: Front Endocrinol (Lausanne). 2025 Aug 28;16:1643543. doi: 10.3389/fendo.2025.1643543 (PMC12422931; doi:10.3389/fendo.2025.1643543)
Supplement: Supplementary Data Sheet 3 — (.\SR\补充表\Supplementary Table S3.xlsx). [file Table3.xlsx]

## Sheet: Clinical validity updates 
Clinical validity updates of male infertility genes: Comparison with Houston et al.
Gene	Location	Disorder	OMIM ID	Inheritance	Conclusion in 2020	Conclusion in 2024	Change 2020 to 2024
ACR	22q13.33	Fertilisation failure	620500	AR	No evidence	Limited	Classification increased
ACTL7A	9q31.3	Fertilisation failure	620499	AR	Unable to classify	Moderate	Classification increased
ADCY10	1q24.2	Primary ciliary dyskinesia	143870	AD	Limited	Moderate	Classification increased
AKAP3	12p13.32	Multiple morphological abnormalities of the sperm flagella	620353	AR	No evidence	Limited	Classification increased
ARL2BP	16q13	Asthenozoospermia and Retinitis Pigmentosa	615434	AR	Limited	Moderate	Classification increased
ARMC2	6q21	Fertilisation failure	618433	AR	Moderate	Definitive	Classification increased
BCORL1	Xq26.1	Oligoasthenoteratozoospermia	300688	XL	Limited	Srtong	Classification increased
BRD2	6p21.32	Non-obstructive azoospermia	601540	AR	Unable to classify	Limited	Classification increased
CATSPER 2	15q15.3	Primary ciliary dyskinesia	611102	AR	No evidence	Limited	Classification increased
CCDC103（DNAAF19）	17q21.31	Primary ciliary dyskinesia	614679	AR	Limited	Srtong	Classification increased
CCDC39	3q26.33	Primary ciliary dyskinesia	613807	AR	Strong	Definitive	Classification increased
CCDC40	17q25.3	Primary ciliary dyskinesia	613808	AR	Srtong	Definitive	Classification increased
DHH	12q13.12	46,XY Disorders of sexual development	233420	AR	Limited	Moderate	Classification increased
DMC1	22q13.1	Non-obstructive azoospermia	602721	AR	Limited	Moderate	Classification increased
DMRT1	9p24.3	Non-obstructive azoospermia	NA	AD	Moderate	Srtong	Classification increased
DNAAF4	15q21.3	Primary ciliary dyskinesia	615482	AR	Srtong	Definitive	Classification increased
DNAAF6	Xq22.3	Primary ciliary dyskinesia	300991	XL	Strong	Definitive	Classification increased
DNAH17	17q25.3	Fertilisation failure	618643	AR	Strong	Definitive	Classification increased
DNAH5	5p15.2	Primary ciliary dyskinesia	608644	AR	Unable to classify	Definitive	Classification increased
DNAH6	2p11.2	asthenoteratozoospermia	603336	AR	Limited	Moderate	Classification increased
DNAI1	9p13.3	Primary ciliary dyskinesia	244400	AR	Limited	Definitive	Classification increased
FANCA	16q24.3	Non-obstructive azoospermia	227650	AR	Moderate	Definitive	Classification increased
FKBPL	6p21.32	azoospermia	617076	AR	No evidence	Limited	Classification increased
FSIP2	2q32.1	Fertilisation failure	618153	AR	Moderate	Srtong	Classification increased
GJB2	13q12.11	Deafness-infertility syndrome	NA	AD	No evidence	Limited	Classification increased
HYDIN	16q22.2	Primary ciliary dyskinesia	608647	AR	Limited	Definitive	Classification increased
KASH5	19q13.33	Fertilisation failure	620547	AR	Limited	Moderate	Classification increased
MAP3K1	5q11.2	46,XY Disorders of sexual development	613762	AD	Limited	Srtong	Classification increased
MEIOB	16p13.3	Fertilisation failure	617706	AR	Limited	Srtong	Classification increased
MNS1	15q21.3	Primary ciliary dyskinesia	618948	AR	Moderate	Srtong	Classification increased
MSH4	1p31.1	Fertilisation failure	108420	AR	No evidence	Moderate	Classification increased
PLK4	4q28.1	Non-obstructive azoospermia	NA	AD	Limited	Moderate	Classification increased
RHOXF1	Xq24	Oligozoospermia	NA	XL	No evidence	Moderate	Classification increased
RXFP2	13q13.1	cryptorchidism	NA	AR	Limited	Moderate	Classification increased
SEMA3E	7q21.11	Kallmann syndrome	608166	AD	No evidence	Limited	Classification increased
SEPTIN12	16p13.3	Fertilisation failure	614822	AD	Moderate	Srtong	Classification increased
SLC9A3	5p15.33	Congenital bilateral absence of the vas deferens	182307	AR	No evidence	Moderate	Classification increased
SLC9C1	3q13.2	asthenozoospermia	612738	AR	No evidence	Limited	Classification increased
SPACA1	6q15	Fertilisation failure	620490	AR	5	Limited	Classification increased
SPEF2	5p13.2	Fertilisation failure	618751	AR	16	Definitive	Classification increased
STAG3	7q22.1	Fertilisation failure	619672	AR	Moderate	Srtong	Classification increased
SYCE1	10q26.3	Fertilisation failure	616950	AR	Limited	Moderate	Classification increased
SYCP2	20q13.33	Fertilisation failure	258150	AD	Moderate	Srtong	Classification increased
TAF7L	Xq22.1	oligozoospermia	NA	XL	No evidence	Limited	Classification increased
TDRD9	14q32.33	Fertilisation failure	618110	AR	Limited	Moderate	Classification increased
TSGA10	2q11.2	Fertilisation failure	617961	AR	Moderate	Srtong	Classification increased
TSSK1B	5q22.2	asthenoteratozoospermia	NA	Undetermined	No evidence	Limited	Classification increased
USP9Y	Yq11.221	azoospermia	415000	YL	Unable to classify	No Evidence	Classification increased
ZFPM2	8q23.1	46,XY Disorders of sexual development	616067	AD	No evidence	Limited	Classification increased
ZMYND15	17p13.2	Fertilisation failure	615842	AR	Limited	Moderate	Classification increased
